# Supplementary material
Source: HighWire-hosted journal article supplement (https://erj.ersjournals.com/content/54/2/1900371)
Supplement: inline-supplementary-material-1 [file inline-supplementary-material-1.pdf]

**ONLINE DATA SUPPLEMENT:**

**Radiomic Measures from Chest HRCT Associated with Lung Function in**

**Sarcoidosis**

Sarah M. Ryan, Tasha E. Fingerlin, Margaret Mroz, Briana Barkes, Nabeel Hamzeh,  
Lisa A. Maier, Nichole E. Carlson

## **Section E1. Study Populations and Data Acquisition**

The sarcoidosis population used in this study was recruited at National Jewish Health (NJH) as part of the NHLBI funded Genomic Research in Alpha-1 Antitrypsin Deficiency and Sarcoidosis (GRADS) study. The GRADS study is a multi-center, observational cohort exploring the role of the microbiome and genome in subjects with Alpha-1 Antitrypsin Deficiency and/or Sarcoidosis<sup>1</sup>. Subjects were eligible for GRADS if they were between the ages of 18 and 85 years, had a confirmed diagnosis of sarcoidosis via biopsy or manifestations consistent with acute sarcoidosis (Lofgren's syndrome), met one of the nine study phenotypes and provided signed informed consent. As part of GRADS, uniform clinical data was obtained including pulmonary function testing (PFT, including pre-bronchodilator (BD) forced expiratory volume at one second (FEV1), forced vital capacity (FVC), and diffusing capacity of the lungs for carbon monoxide (DLCO)), a chest radiograph (for Scadding staging classification), and a research chest HRCT based on the COPDGene protocol<sup>2</sup>. Of 79 GRADS sarcoidosis subjects enrolled at NJH, N=73 subjects with a HRCT usable for quantitative analysis were used in this study. Research chest HRCTs used in this study were acquired using Siemens SOMATOM Definition (N=22) or Siemens SOMATOM Definition AS+ (N=51), with the participants in the supine position during breath holding at end inspiration, and the following parameters: 120 kVp, effective tube current average 180-330 mA (varied by BMI), 500 msec exposure time, standard B35f kernel, 0.75 mm thickness, and computed interval of 0.5 mm<sup>1</sup>.

A non-smoking, healthy control population was obtained from the COPDGene study. COPDGene is a cross-sectional prospective cohort exploring epidemiological and

genetic characteristics in smokers with and without chronic obstructive pulmonary disease<sup>3</sup>. A total of 108 healthy nonsmokers were recruited for COPDGene that were between the ages of 45 and 80 years, with no history of lung disease and normal postbronchodilator spirometry<sup>2</sup>. As part of COPDGene, uniform clinical data was obtained including PFT (spirometry and lung volumes) and a research chest HRCT. As DLCO was not collected in COPDGene, it was not used as an outcome in this study. Of 108 COPDGene non-smoking healthy controls, N=78 subjects were included in the present study who had a HRCT acquired using Siemens SOMATOM Definition (N=45), Siemens SOMATOM Definition Flash (N=25), Siemens SOMATOM Definition AS+ (N=6) or Siemens SOMATOM Sensation 64 (N=2). These HRCT had the same parameters as GRADS, except for a tube current average of 400 mA; according to Mackin<sup>4</sup>, we do not believe that this difference in tube current affected our radiomic results.

## **Section E2. Data-Processing**

Each CT scan had the same axial slice thickness (0.750mm) and interval (0.500mm); however, since a 512x512 image matrix was used for the reconstruction, the spacing in the coronal and sagittal planes were dependent on the size of the subject. To remove spacing variability across subjects and anatomical planes, all scans were resampled to 1x1x1 mm<sup>3</sup> spacing. A thresholding- and region-based segmentation technique, as implemented in the `lungct` R package, was used to segment the left and right lung from the resampled scans. CT scans were further thresholded at HU<0 to remove non-lung tissue found on the boundaries of the masked CT. Masked CT slices with less than

2,000 pixels (approximately 5% or less of the masked slice) were discarded due to small image size and unstable estimates; this resulted in the removal of approximately 15% of slices per person.

### **Section E3. Radiomic Measures**

Radiomics can be divided into first and second order measures. First order measures quantify features of the distribution of the Hounsfield unit (HU) pixel values, such as the mean, median, standard deviation, skewness and kurtosis, among others<sup>5</sup>. Second order measures quantify spatial smoothness or associations between adjacent pixels. Examples include grey-level co-occurrence matrices (GLCMs), grey-level run-length matrices (GLRLMs), fractal dimension, Moran's I and Geary's C, among others<sup>5</sup>. Typical radiomic analyses investigate a large number of radiomic features by using a validation procedure, whereby a subset of the data is used to select important radiomic features, and an additional subset of the data is used to evaluate the selected radiomic features<sup>6</sup>. However, this approach requires a large amount of data<sup>7</sup>. Given our moderate sample size (N=151) and to avoid the problem of false positive findings, we have pre-selected five radiomic features that we hypothesize will be useful to differentiate sarcoidosis and control groups.

From the first-order measures, we selected skewness and kurtosis as both measure the non-normality of the distribution which we observe in lung CTs (Figure 1); additionally, both have been shown to be successful for idiopathic pulmonary fibrosis<sup>8</sup>, a disease which results in increased opacification on CT scans, similar to sarcoidosis. Since sarcoidosis results in increased opacification (i.e. whiter regions) on HRCT from

parenchymal abnormalities (such as micronodules, conglomerate masses, fibrosis and other radiographic patterns), we hypothesized that there would be less skewness and less kurtosis in sarcoidosis subjects as compared to controls; that is, we hypothesize that the increased opacification on the CT scans from sarcoidosis subjects will alter the HU distribution to appear more normally distributed (Figure 1; Table 1).

From the second-order measures, we pre-selected fractal dimension<sup>9</sup>, Moran's I<sup>10</sup> and Geary's C<sup>11</sup> as all measure the spatial smoothness of the data, where smoothness is defined as adjacent pixels appearing more similar, which we observe in lung CTs (Figure 1); further, these spatial summaries have shown to be very useful in detecting lung nodules<sup>12,13</sup>. Lower values of fractal dimension and Geary's C, and higher values of Moran's I are indicative of more smoothness. Since sarcoidosis involves the formation of micronodules in the lung that begin to conglomerate as disease worsens and/or fibrosis may develop, we hypothesized that there would be lower fractal dimension, lower Geary's C, and higher Moran's I in sarcoidosis subjects as compared to controls, since the aggregation of nodules (conglomerate masses) will result in adjacent pixels appearing more similar on a CT scan (Figure 1; Table 1).

Fractal dimension was estimated using the line transect madogram estimator for spatial data (27). Moran's I and Geary's C were estimated using an eight-nearest neighbor adjacency matrix. Mathematical representations of these measures can be found in Table 1. All measures were calculated using the `lungct` R package.

## **Section E4. Statistical Analysis**

*Demographics.* Descriptive statistics (e.g. mean and standard deviation for continuous variables; frequency tables for categorical variables) were used to summarize demographic and spirometry data. To test for an association between disease group and gender, a Chi-square test was used. To test for an association between disease group and race (white/non-white), a Fisher's exact test was used, due to small cell sample sizes. Linear regression models were used to test for differences in means for all continuous variables between sarcoidosis and healthy controls, and between Scadding stages. Continuous variables include age at consent, BMI, pre-BD FEV1, pre-BD FVC, and FEV1:FVC.

*Differences in Global Radiomics between Sarcoidosis and Controls.* Each radiomic measure was computed on every third slice for every subject in each of the two lungs and three anatomical planes. To arrive at a single “global” value, the median value across each subject, lung and orientation were computed. Descriptive statistics (e.g. means and standard deviations) were used to summarize the global radiomic measures between disease groups. Linear regression models were used to test for differences in global radiomic measures between sarcoidosis and healthy controls, adjusted for age, gender, and BMI.

*Associations between Global Radiomic Measures and Lung Function.* To evaluate the difference in disease (i.e. sarcoidosis vs. control) on the association between lung function and global radiomic measures, linear regression was used with an interaction between disease group and global radiomic measures. When the effect of disease group was significant, the association between global radiomic measure and lung function is reported (estimates, standard errors, and p-values) separately by the

specific disease; otherwise, the interaction was removed, and the association is reported over all participants.

*Differences in Spatial Radiomics between Sarcoidosis and Controls.* We also analyzed the curve of radiomic measures throughout the lung that results from the computation of radiomic measures on each slice in both the right and left lung in each of the three anatomical orientations. Functional regression was used to determine whether there is a spatially-varying association between subjects with and without sarcoidosis on each radiomic measure; that is, whether certain regions of the lung were more different between sarcoidosis and control than other regions. We used penalized smoothing splines for our functional data analysis. The optimal degrees of freedom for the penalized smoothing spline was determined using the corrected Akaike Information Criteria (cAIC)<sup>14</sup>. The functional regression was adjusted for gender, age, and BMI. Standard errors and 95% confidence intervals were obtained from 1000 bootstrapped samples. The t-statistic was computed using the absolute value of the difference between sarcoidosis and healthy controls divided by the standard error at each slice percentage.

*Comparisons between Scadding Stage.* In sarcoidosis subjects, linear regression models were used to test for differences in global radiomic measures between Scadding stages, adjusted for age, gender, and BMI. If a significant difference was found in Scadding stage, pairwise comparisons were performed, with significance defined as  $p < 0.005$  for multiple comparisons (10 different combinations of pairwise differences between Scadding stages). Linear regression models were also used to estimate the amount of variance in lung function explained (i.e. adjusted r-squared) by Scadding

stage versus a combination of global radiomic measures. Step-wise regression based on AIC was used to determine which combination of global radiomic measures resulted in best model fit. Finally, functional regression using penalized smoothing splines were used to summarize radiomic measures throughout the lung between Scadding stages. Due to small sample sizes and low power, only mean estimates by Scadding stage are reported.

Analyses were independently performed for radiomic measures of skewness, kurtosis, fractal dimension, Moran's I, and Geary's C. All analyses were performed in Rstudio v1.0.136. Results were considered significant at a  $p < 0.05$ .



## REFERENCES

1. Moller DR, Koth LL, Maier LA, Morris A, Drake W, Rossman M, Leader JK, Collman RG, Hamzeh N, Sweiss NJ, Zhang Y, O'Neal S, Senior RM, Becich M, Hochheiser HS, Kaminski N, Wisniewski SR, Gibson KF, GRADS Sarcoidosis Study Group. Rationale and Design of the Genomic Research in Alpha-1 Antitrypsin Deficiency and Sarcoidosis (GRADS) Study. *Sarcoidosis Protocol. Ann Am Thorac Soc* 2015;**12**:1561–1571.
2. Zach J, Newell J, Schroeder J, Murphy J, Curran-Everett D, Hoffman E, Westgate P, Han M, Silverman E, Crapo J, Lynch D. Quantitative CT of the Lungs and Airways in Healthy Non-smoking Adults. *Invest Radiol* 2012;**47**:596–602.
3. Regan EA, Hokanson JE, Murphy JR, Make B, Lynch DA, Beaty TH, Curran-Everett D, Silverman EK, Crapo JD. Genetic epidemiology of COPD (COPDGene) study design. *COPD* 2010;**7**:32–43.
4. Mackin D, Ger R, Dodge C, Fave X, Chi P-C, Zhang L, Yang J, Bache S, Dodge C, Jones AK, Court L. Effect of tube current on computed tomography radiomic features. *Sci Rep* 2018;**8**:2354.
5. Lee G, Lee HY, Park H, Schiebler ML, Beek EJR van, Ohno Y, Seo JB, Leung A. Radiomics and its emerging role in lung cancer research, imaging biomarkers and clinical management: State of the art. *Eur J Radiol* 2017;**86**:297–307.
6. Aerts HJWL, Velazquez ER, Leijenaar RTH, Parmar C, Grossmann P, Carvalho S, Cavalho S, Bussink J, Monshouwer R, Haibe-Kains B, Rietveld D, Hoebers F, Rietbergen MM, Leemans CR, Dekker A, Quackenbush J, Gillies RJ, Lambin P. Decoding tumour phenotype by noninvasive imaging using a quantitative radiomics approach. *Nat Commun* 2014;**5**:4006.
7. Gillies RJ, Kinahan PE, Hricak H. Radiomics: Images Are More than Pictures, They Are Data. *Radiology* 2015;**278**:563–577.
8. Best AC, Meng J, Lynch AM, Bozic CM, Miller D, Grunwald GK, Lynch DA. Idiopathic Pulmonary Fibrosis: Physiologic Tests, Quantitative CT Indexes, and CT Visual Scores as Predictors of Mortality. *Radiology* 2008;**246**:935–940.
9. Gneiting T, Ševčíková H, Percival DB. Estimators of Fractal Dimension: Assessing the Roughness of Time Series and Spatial Data. *Stat Sci* 2012;**27**:247–277.
10. Moran PAP. Notes on Continuous Stochastic Phenomena. *Biometrika* 1950;**37**:17–23.
11. Geary RC. The Contiguity Ratio and Statistical Mapping. *Inc Stat* 1954;**5**:115–146.

12. Silva EC da, Silva AC, Paiva AC de, Nunes RA. Diagnosis of lung nodule using Moran's index and Geary's coefficient in computerized tomography images. *Pattern Anal Appl* 2008;**11**:89–99.
13. Tanabe N, Muro S, Sato S, Oguma T, Sato A, Hirai T. Fractal analysis of low attenuation clusters on computed tomography in chronic obstructive pulmonary disease. *BMC Pulm Med* 2018;**18**:144.
14. Hurvich CM, Tsai C-L. The Impact of Model Selection on Inference in Linear Regression. *Am Stat* 1990;**44**:214–217.

## TABLES

Table E1. Differences in global radiomic features between pulmonary sarcoidosis and Scadding stage. P-values are adjusted for gender, age, and BMI. Global radiomic features are calculated from global values across the **left** lung. Values are summarized by mean (standard error). Fractal D = fractal dimension.

|                 |           | <b>Control</b>    | <b>Sarcoidosis</b> | <b>P-value</b> | <b>Stage 0</b>    | <b>Stage I</b>    | <b>Stage II</b>   | <b>Stage III</b>  | <b>Stage IV</b>  | <b>P-value</b> |
|-----------------|-----------|-------------------|--------------------|----------------|-------------------|-------------------|-------------------|-------------------|------------------|----------------|
|                 |           | (N = 78)          | (N = 73)           |                | (N = 9)           | (N = 8)           | (N = 28)          | (N = 11)          | (N = 17)         |                |
| <b>Axial</b>    | Skewness  | 3.642<br>(0.060)  | 3.166<br>(0.085)   | <0.001         | 3.009<br>(0.131)  | 3.491<br>(0.198)  | 3.309<br>(0.150)  | 3.373<br>(0.187)  | 2.727<br>(0.172) | 0.027          |
|                 | Kurtosis  | 16.653<br>(0.600) | 12.732<br>(0.688)  | <0.001         | 10.879<br>(1.102) | 15.052<br>(2.003) | 14.084<br>(1.259) | 14.248<br>(1.741) | 9.413<br>(1.066) | 0.032          |
|                 | Fractal D | 2.429<br>(0.003)  | 2.404<br>(0.004)   | <0.001         | 2.434<br>(0.011)  | 2.437<br>(0.006)  | 2.397<br>(0.004)  | 2.421<br>(0.005)  | 2.374<br>(0.008) | <0.001         |
|                 | Moran's I | 0.691<br>(0.004)  | 0.702<br>(0.005)   | 0.047          | 0.667<br>(0.013)  | 0.668<br>(0.013)  | 0.715<br>(0.005)  | 0.680<br>(0.007)  | 0.729<br>(0.008) | <0.001         |
|                 | Geary's C | 0.226<br>(0.002)  | 0.212<br>(0.002)   | <0.001         | 0.226<br>(0.006)  | 0.227<br>(0.005)  | 0.208<br>(0.003)  | 0.229<br>(0.005)  | 0.195<br>(0.002) | <0.001         |
| <b>Coronal</b>  | Skewness  | 3.576<br>(0.058)  | 3.115<br>(0.082)   | <0.001         | 2.945<br>(0.120)  | 3.441<br>(0.194)  | 3.261<br>(0.146)  | 3.337<br>(0.176)  | 2.668<br>(0.166) | 0.016          |
|                 | Kurtosis  | 16.133<br>(0.588) | 12.349<br>(0.677)  | <0.001         | 10.335<br>(1.045) | 14.433<br>(1.903) | 13.739<br>(1.285) | 13.955<br>(1.649) | 9.106<br>(0.958) | 0.03           |
|                 | Fractal D | 2.450<br>(0.003)  | 2.434<br>(0.004)   | <0.001         | 2.458<br>(0.009)  | 2.460<br>(0.007)  | 2.428<br>(0.004)  | 2.453<br>(0.006)  | 2.404<br>(0.009) | <0.001         |
|                 | Moran's I | 0.688<br>(0.004)  | 0.700<br>(0.004)   | 0.01           | 0.666<br>(0.012)  | 0.674<br>(0.012)  | 0.711<br>(0.005)  | 0.673<br>(0.008)  | 0.729<br>(0.008) | <0.001         |
|                 | Geary's C | 0.235<br>(0.003)  | 0.220<br>(0.003)   | <0.001         | 0.232<br>(0.009)  | 0.229<br>(0.006)  | 0.219<br>(0.005)  | 0.239<br>(0.006)  | 0.199<br>(0.005) | <0.001         |
| <b>Sagittal</b> | Skewness  | 3.360<br>(0.054)  | 2.986<br>(0.076)   | <0.001         | 2.843<br>(0.122)  | 3.272<br>(0.161)  | 3.120<br>(0.129)  | 3.201<br>(0.155)  | 2.567<br>(0.169) | 0.014          |
|                 | Kurtosis  | 14.626<br>(0.567) | 11.605<br>(0.650)  | <0.001         | 9.768<br>(1.057)  | 13.578<br>(1.842) | 12.968<br>(1.188) | 13.377<br>(1.665) | 8.257<br>(0.944) | 0.017          |
|                 | Fractal D | 2.478<br>(0.004)  | 2.454<br>(0.005)   | <0.001         | 2.491<br>(0.015)  | 2.479<br>(0.007)  | 2.449<br>(0.006)  | 2.470<br>(0.008)  | 2.420<br>(0.012) | <0.001         |
|                 | Moran's I | 0.684<br>(0.003)  | 0.705<br>(0.004)   | <0.001         | 0.671<br>(0.010)  | 0.676<br>(0.010)  | 0.715<br>(0.004)  | 0.682<br>(0.005)  | 0.736<br>(0.009) | <0.001         |
|                 | Geary's C | 0.239<br>(0.004)  | 0.214<br>(0.004)   | <0.001         | 0.227<br>(0.009)  | 0.222<br>(0.007)  | 0.215<br>(0.006)  | 0.233<br>(0.010)  | 0.191<br>(0.005) | 0.002          |

Table E2. Differences in global radiomic features between pulmonary sarcoidosis and Scadding stage. P-values are adjusted for gender, age, and BMI. Global radiomic features are calculated from global values across the **right** lung. Values are summarized by mean (standard error). Fractal D = fractal dimension.

|                 |                  | Control<br>N = 78 | Sarcoidosis<br>N = 73 | P-<br>value | Stage<br>0<br>N = 9 | Stage<br>I<br>N = 8 | Stage<br>II<br>N = 28 | Stage<br>III<br>N = 11 | Stage<br>IV<br>N = 17 | P-<br>value |
|-----------------|------------------|-------------------|-----------------------|-------------|---------------------|---------------------|-----------------------|------------------------|-----------------------|-------------|
| <b>Axial</b>    | <b>Skewness</b>  | 3.725<br>(0.060)  | 3.181<br>(0.077)      | <0.001      | 3.150<br>(0.127)    | 3.611<br>(0.200)    | 3.263<br>(0.139)      | 3.435<br>(0.182)       | 2.695<br>(0.114)      | 0.002       |
|                 | <b>Kurtosis</b>  | 17.432<br>(0.600) | 12.839<br>(0.673)     | <0.001      | 12.007<br>(1.060)   | 16.197<br>(2.091)   | 13.644<br>(1.193)     | 14.888<br>(1.754)      | 9.046<br>(0.933)      | 0.007       |
|                 | <b>Fractal D</b> | 2.433<br>(0.003)  | 2.406<br>(0.004)      | <0.001      | 2.437<br>(0.011)    | 2.439<br>(0.006)    | 2.396<br>(0.004)      | 2.423<br>(0.006)       | 2.380<br>(0.007)      | <0.001      |
|                 | <b>Moran's I</b> | 0.685<br>(0.004)  | 0.701<br>(0.005)      | 0.003       | 0.661<br>(0.015)    | 0.665<br>(0.011)    | 0.715<br>(0.006)      | 0.682<br>(0.008)       | 0.730<br>(0.006)      | <0.001      |
|                 | <b>Geary's C</b> | 0.232<br>(0.002)  | 0.214<br>(0.002)      | <0.001      | 0.230<br>(0.006)    | 0.232<br>(0.005)    | 0.209<br>(0.003)      | 0.230<br>(0.005)       | 0.194<br>(0.003)      | <0.001      |
|                 |                  |                   |                       |             |                     |                     |                       |                        |                       |             |
| <b>Coronal</b>  | <b>Skewness</b>  | 3.700<br>(0.055)  | 3.172<br>(0.075)      | <0.001      | 3.103<br>(0.117)    | 3.532<br>(0.198)    | 3.247<br>(0.139)      | 3.433<br>(0.158)       | 2.747<br>(0.123)      | 0.009       |
|                 | <b>Kurtosis</b>  | 17.110<br>(0.552) | 12.770<br>(0.656)     | <0.001      | 11.591<br>(0.991)   | 15.398<br>(1.984)   | 13.736<br>(1.221)     | 14.590<br>(1.471)      | 9.390<br>(1.023)      | 0.022       |
|                 | <b>Fractal D</b> | 2.452<br>(0.003)  | 2.435<br>(0.004)      | <0.001      | 2.463<br>(0.011)    | 2.459<br>(0.006)    | 2.425<br>(0.004)      | 2.453<br>(0.007)       | 2.411<br>(0.007)      | <0.001      |
|                 | <b>Moran's I</b> | 0.684<br>(0.003)  | 0.699<br>(0.005)      | 0.001       | 0.659<br>(0.013)    | 0.670<br>(0.012)    | 0.712<br>(0.005)      | 0.674<br>(0.009)       | 0.727<br>(0.008)      | <0.001      |
|                 | <b>Geary's C</b> | 0.238<br>(0.002)  | 0.220<br>(0.003)      | <0.001      | 0.236<br>(0.006)    | 0.233<br>(0.006)    | 0.217<br>(0.005)      | 0.236<br>(0.006)       | 0.199<br>(0.005)      | <0.001      |
|                 |                  |                   |                       |             |                     |                     |                       |                        |                       |             |
| <b>Sagittal</b> | <b>Skewness</b>  | 3.449<br>(0.054)  | 2.998<br>(0.069)      | <0.001      | 2.915<br>(0.120)    | 3.360<br>(0.174)    | 3.092<br>(0.123)      | 3.209<br>(0.157)       | 2.578<br>(0.109)      | 0.003       |
|                 | <b>Kurtosis</b>  | 15.261<br>(0.561) | 11.404<br>(0.613)     | <0.001      | 10.422<br>(1.102)   | 14.025<br>(1.974)   | 12.450<br>(1.084)     | 13.150<br>(1.604)      | 7.837<br>(0.756)      | 0.006       |
|                 | <b>Fractal D</b> | 2.483<br>(0.004)  | 2.457<br>(0.005)      | <0.001      | 2.500<br>(0.015)    | 2.485<br>(0.008)    | 2.447<br>(0.005)      | 2.474<br>(0.009)       | 2.426<br>(0.009)      | <0.001      |
|                 | <b>Moran's I</b> | 0.675<br>(0.003)  | 0.701<br>(0.005)      | <0.001      | 0.658<br>(0.012)    | 0.657<br>(0.009)    | 0.712<br>(0.005)      | 0.681<br>(0.008)       | 0.738<br>(0.007)      | <0.001      |
|                 | <b>Geary's C</b> | 0.246<br>(0.004)  | 0.221<br>(0.004)      | <0.001      | 0.239<br>(0.010)    | 0.236<br>(0.008)    | 0.222<br>(0.006)      | 0.233<br>(0.007)       | 0.193<br>(0.006)      | <0.001      |
|                 |                  |                   |                       |             |                     |                     |                       |                        |                       |             |

Table E3. Effect of disease group on the association between lung function and global radiomic features from the left lung, adjusted for gender, age, and BMI. FEV1 = pre-bronchodilator forced expiratory volume at one second. FVC = pre-bronchodilator forced vital capacity. FractalD = fractal dimension.

| Position | Outcome  | Variable  | P-value of difference | Effect of Sarcoidosis         | Effect of Control              | Effect of both groups         | Adjusted R-sq |
|----------|----------|-----------|-----------------------|-------------------------------|--------------------------------|-------------------------------|---------------|
| Axial    | FEV1     | Skewness  | 0.056                 | --                            | --                             | 0.353<br>SE=0.078<br>p<0.001  | 0.549         |
| Axial    | FEV1     | Kurtosis  | 0.032                 | 0.053<br>SE=0.012<br>p<0.001  | 0.017<br>SE=0.013<br>p=0.189   | --                            | 0.548         |
| Axial    | FEV1     | FractalD  | 0.001                 | 9.251<br>SE=2.217<br>p<0.001  | -1.762<br>SE=2.846<br>p=0.537  | --                            | 0.54          |
| Axial    | FEV1     | Moran's I | 0.011                 | -3.681<br>SE=1.949<br>p=0.061 | 3.220<br>SE=1.895<br>p=0.091   | --                            | 0.504         |
| Axial    | FEV1     | Geary's C | <0.001                | 15.711<br>SE=3.629<br>p<0.001 | -10.928<br>SE=4.475<br>p=0.016 | --                            | 0.561         |
| Axial    | FVC      | Skewness  | 0.127                 | --                            | --                             | 0.428<br>SE=0.094<br>p<0.001  | 0.593         |
| Axial    | FVC      | Kurtosis  | 0.113                 | --                            | --                             | 0.045<br>SE=0.011<br>p<0.001  | 0.585         |
| Axial    | FVC      | FractalD  | 0.014                 | 8.566<br>SE=2.749<br>p=0.002  | -1.850<br>SE=3.529<br>p=0.601  | --                            | 0.564         |
| Axial    | FVC      | Moran's I | 0.007                 | -3.166<br>SE=2.343<br>p=0.179 | 5.696<br>SE=2.279<br>p=0.014   | --                            | 0.557         |
| Axial    | FVC      | Geary's C | 0.002                 | 12.440<br>SE=4.603<br>p=0.008 | -9.735<br>SE=5.676<br>p=0.089  | --                            | 0.564         |
| Axial    | FEV1:FVC | Skewness  | 0.171                 | --                            | --                             | 0.007<br>SE=0.010<br>p=0.478  | 0.057         |
| Axial    | FEV1:FVC | Kurtosis  | 0.087                 | --                            | --                             | 0.000<br>SE=0.001<br>p=0.712  | 0.054         |
| Axial    | FEV1:FVC | FractalD  | 0.016                 | 0.879<br>SE=0.264<br>p=0.001  | -0.097<br>SE=0.339<br>p=0.776  | --                            | 0.121         |
| Axial    | FEV1:FVC | Moran's I | 0.381                 | --                            | --                             | -0.418<br>SE=0.160<br>p=0.010 | 0.097         |

|          |          |           |        |                               |                               |                               |       |
|----------|----------|-----------|--------|-------------------------------|-------------------------------|-------------------------------|-------|
| Axial    | FEV1:FVC | Geary's C | <0.001 | 2.114<br>SE=0.415<br>p<0.001  | -1.063<br>SE=0.512<br>p=0.040 | --                            | 0.221 |
| Coronal  | FEV1     | Skewness  | 0.042  | 0.497<br>SE=0.094<br>p<0.001  | 0.180<br>SE=0.130<br>p=0.167  | --                            | 0.569 |
| Coronal  | FEV1     | Kurtosis  | 0.023  | 0.057<br>SE=0.012<br>p<0.001  | 0.018<br>SE=0.013<br>p=0.158  | --                            | 0.557 |
| Coronal  | FEV1     | FractalD  | <0.001 | 11.147<br>SE=2.157<br>p<0.001 | -1.625<br>SE=2.782<br>p=0.560 | --                            | 0.567 |
| Coronal  | FEV1     | Moran's I | <0.001 | -6.190<br>SE=2.054<br>p=0.003 | 4.347<br>SE=2.184<br>p=0.049  | --                            | 0.527 |
| Coronal  | FEV1     | Geary's C | <0.001 | 12.526<br>SE=2.631<br>p<0.001 | -1.913<br>SE=2.809<br>p=0.497 | --                            | 0.556 |
| Coronal  | FVC      | Skewness  | 0.127  | --                            | --                            | 0.470<br>SE=0.096<br>p<0.001  | 0.602 |
| Coronal  | FVC      | Kurtosis  | 0.106  | --                            | --                            | 0.049<br>SE=0.011<br>p<0.001  | 0.591 |
| Coronal  | FVC      | FractalD  | 0.002  | 10.551<br>SE=2.703<br>p<0.001 | -2.479<br>SE=3.486<br>p=0.478 | --                            | 0.581 |
| Coronal  | FVC      | Moran's I | 0.001  | -4.481<br>SE=2.500<br>p=0.075 | 7.507<br>SE=2.659<br>p=0.005  | --                            | 0.568 |
| Coronal  | FVC      | Geary's C | 0.043  | 9.190<br>SE=3.353<br>p=0.007  | -0.366<br>SE=3.580<br>p=0.919 | --                            | 0.555 |
| Coronal  | FEV1:FVC | Skewness  | 0.108  | --                            | --                            | 0.009<br>SE=0.010<br>p=0.369  | 0.059 |
| Coronal  | FEV1:FVC | Kurtosis  | 0.063  | --                            | --                            | 0.001<br>SE=0.001<br>p=0.647  | 0.055 |
| Coronal  | FEV1:FVC | FractalD  | 0.034  | 0.968<br>SE=0.263<br>p<0.001  | 0.109<br>SE=0.339<br>p=0.748  | --                            | 0.131 |
| Coronal  | FEV1:FVC | Moran's I | 0.069  | --                            | --                            | -0.686<br>SE=0.179<br>p<0.001 | 0.142 |
| Coronal  | FEV1:FVC | Geary's C | <0.001 | 1.627<br>SE=0.298<br>p<0.001  | -0.430<br>SE=0.318<br>p=0.178 | --                            | 0.23  |
| Sagittal | FEV1     | Skewness  | 0.042  | 0.510<br>SE=0.104<br>p<0.001  | 0.166<br>SE=0.139<br>p=0.235  | --                            | 0.558 |
| Sagittal | FEV1     | Kurtosis  | 0.027  | 0.056<br>SE=0.012<br>p<0.001  | 0.017<br>SE=0.013<br>p=0.218  | --                            | 0.548 |

|          |          |           |        |                               |                               |                              |       |
|----------|----------|-----------|--------|-------------------------------|-------------------------------|------------------------------|-------|
| Sagittal | FEV1     | FractalD  | <0.001 | 9.363<br>SE=1.743<br>p<0.001  | 0.332<br>SE=2.033<br>p=0.870  | --                           | 0.571 |
| Sagittal | FEV1     | Moran's I | <0.001 | -8.043<br>SE=2.123<br>p<0.001 | 5.048<br>SE=2.741<br>p=0.068  | --                           | 0.541 |
| Sagittal | FEV1     | Geary's C | <0.001 | 10.366<br>SE=2.209<br>p<0.001 | 0.083<br>SE=2.005<br>p=0.967  | --                           | 0.551 |
| Sagittal | FVC      | Skewness  | 0.115  | --                            | --                            | 0.478<br>SE=0.105<br>p<0.001 | 0.593 |
| Sagittal | FVC      | Kurtosis  | 0.13   | --                            | --                            | 0.048<br>SE=0.012<br>p<0.001 | 0.585 |
| Sagittal | FVC      | FractalD  | 0.009  | 8.971<br>SE=2.192<br>p<0.001  | 0.970<br>SE=2.556<br>p=0.705  | --                           | 0.581 |
| Sagittal | FVC      | Moran's I | <0.001 | -6.323<br>SE=2.613<br>p=0.017 | 8.582<br>SE=3.374<br>p=0.012  | --                           | 0.571 |
| Sagittal | FVC      | Geary's C | 0.102  | --                            | --                            | 4.670<br>SE=1.962<br>p=0.019 | 0.552 |
| Sagittal | FEV1:FVC | Skewness  | 0.124  | --                            | --                            | 0.006<br>SE=0.011<br>p=0.553 | 0.056 |
| Sagittal | FEV1:FVC | Kurtosis  | 0.047  | 0.002<br>SE=0.002<br>p=0.162  | -0.002<br>SE=0.002<br>p=0.195 | --                           | 0.073 |
| Sagittal | FEV1:FVC | FractalD  | 0.004  | 0.781<br>SE=0.213<br>p<0.001  | -0.071<br>SE=0.248<br>p=0.776 | --                           | 0.136 |
| Sagittal | FEV1:FVC | Moran's I | 0.035  | -1.180<br>SE=0.243<br>p<0.001 | -0.364<br>SE=0.313<br>p=0.248 | --                           | 0.188 |
| Sagittal | FEV1:FVC | Geary's C | <0.001 | 1.334<br>SE=0.248<br>p<0.001  | -0.405<br>SE=0.225<br>p=0.075 | --                           | 0.232 |

Table E4. Effect of disease group on the association between lung function and global radiomic features from the right lung, adjusted for gender, age, and BMI. FEV1 = pre-bronchodilator forced expiratory volume at one second. FVC = pre-bronchodilator forced vital capacity. Fractal D = fractal dimension.

| Position | Outcome  | Variable  | P-value of difference | Effect of Sarcoidosis p-value | Effect of Control P-value     | Effect of both groups         | Adjusted R-sq |
|----------|----------|-----------|-----------------------|-------------------------------|-------------------------------|-------------------------------|---------------|
| Axial    | FEV1     | Skewness  | 0.006                 | 0.593<br>SE=0.099<br>p<0.001  | 0.170<br>SE=0.122<br>p=0.168  | --                            | 0.588         |
| Axial    | FEV1     | Kurtosis  | 0.007                 | 0.063<br>SE=0.012<br>p<0.001  | 0.018<br>SE=0.012<br>p=0.150  | --                            | 0.571         |
| Axial    | FEV1     | FractalD  | 0.001                 | 10.610<br>SE=2.344<br>p<0.001 | -1.299<br>SE=3.046<br>p=0.671 | --                            | 0.549         |
| Axial    | FEV1     | Moran's I | 0.008                 | -4.250<br>SE=1.907<br>p=0.027 | 2.609<br>SE=1.781<br>p=0.145  | --                            | 0.506         |
| Axial    | FEV1     | Geary's C | <0.001                | 15.915<br>SE=3.301<br>p<0.001 | -7.303<br>SE=4.122<br>p=0.079 | --                            | 0.564         |
| Axial    | FVC      | Skewness  | 0.041                 | 0.645<br>SE=0.122<br>p<0.001  | 0.261<br>SE=0.151<br>p=0.086  | --                            | 0.613         |
| Axial    | FVC      | Kurtosis  | 0.054                 | --                            | --                            | 0.050<br>SE=0.011<br>p<0.001  | 0.594         |
| Axial    | FVC      | FractalD  | 0.019                 | 8.776<br>SE=2.947<br>p=0.003  | -1.810<br>SE=3.830<br>p=0.637 | --                            | 0.559         |
| Axial    | FVC      | Moran's I | 0.012                 | -3.342<br>SE=2.310<br>p=0.150 | 4.590<br>SE=2.158<br>p=0.035  | --                            | 0.553         |
| Axial    | FVC      | Geary's C | 0.01                  | 12.459<br>SE=4.216<br>p=0.004 | -4.887<br>SE=5.265<br>p=0.355 | --                            | 0.561         |
| Axial    | FEV1:FVC | Skewness  | 0.026                 | 0.032<br>SE=0.013<br>p=0.013  | -0.012<br>SE=0.016<br>p=0.458 | --                            | 0.094         |
| Axial    | FEV1:FVC | Kurtosis  | 0.021                 | 0.003<br>SE=0.001<br>p=0.028  | -0.001<br>SE=0.002<br>p=0.337 | --                            | 0.088         |
| Axial    | FEV1:FVC | FractalD  | 0.007                 | 1.211<br>SE=0.275<br>p<0.001  | 0.065<br>SE=0.357<br>p=0.856  | --                            | 0.164         |
| Axial    | FEV1:FVC | Moran's I | 0.143                 | --                            | --                            | -0.426<br>SE=0.153<br>p=0.006 | 0.102         |



|          |          |           |        |                               |                               |                               |       |
|----------|----------|-----------|--------|-------------------------------|-------------------------------|-------------------------------|-------|
| Axial    | FEV1:FVC | Geary's C | <0.001 | 2.044<br>SE=0.374<br>p<0.001  | -1.043<br>SE=0.468<br>p=0.027 | --                            | 0.241 |
| Coronal  | FEV1     | Skewness  | 0.012  | 0.618<br>SE=0.101<br>p<0.001  | 0.207<br>SE=0.134<br>p=0.126  | --                            | 0.593 |
| Coronal  | FEV1     | Kurtosis  | 0.01   | 0.065<br>SE=0.012<br>p<0.001  | 0.021<br>SE=0.013<br>p=0.128  | --                            | 0.575 |
| Coronal  | FEV1     | FractalD  | <0.001 | 12.481<br>SE=2.379<br>p<0.001 | -0.556<br>SE=3.040<br>p=0.855 | --                            | 0.569 |
| Coronal  | FEV1     | Moran's I | 0.003  | -5.142<br>SE=2.053<br>p=0.013 | 3.794<br>SE=2.289<br>p=0.100  | --                            | 0.514 |
| Coronal  | FEV1     | Geary's C | 0.002  | 10.426<br>SE=2.783<br>p<0.001 | -3.417<br>SE=3.521<br>p=0.333 | --                            | 0.532 |
| Coronal  | FVC      | Skewness  | 0.054  | --                            | --                            | 0.568<br>SE=0.103<br>p<0.001  | 0.616 |
| Coronal  | FVC      | Kurtosis  | 0.056  | --                            | --                            | 0.057<br>SE=0.011<br>p<0.001  | 0.604 |
| Coronal  | FVC      | FractalD  | 0.004  | 11.165<br>SE=3.002<br>p<0.001 | -1.611<br>SE=3.836<br>p=0.675 | --                            | 0.576 |
| Coronal  | FVC      | Moran's I | 0.004  | -3.360<br>SE=2.488<br>p=0.179 | 7.136<br>SE=2.774<br>p=0.011  | --                            | 0.559 |
| Coronal  | FVC      | Geary's C | 0.109  | --                            | --                            | 3.899<br>SE=2.863<br>p=0.175  | 0.54  |
| Coronal  | FEV1:FVC | Skewness  | 0.075  | --                            | --                            | 0.012<br>SE=0.011<br>p=0.260  | 0.062 |
| Coronal  | FEV1:FVC | Kurtosis  | 0.06   | --                            | --                            | 0.001<br>SE=0.001<br>p=0.539  | 0.056 |
| Coronal  | FEV1:FVC | FractalD  | 0.025  | 1.248<br>SE=0.285<br>p<0.001  | 0.295<br>SE=0.364<br>p=0.419  | --                            | 0.161 |
| Coronal  | FEV1:FVC | Moran's I | 0.225  | --                            | --                            | -0.716<br>SE=0.181<br>p<0.001 | 0.148 |
| Coronal  | FEV1:FVC | Geary's C | <0.001 | 1.506<br>SE=0.314<br>p<0.001  | -0.513<br>SE=0.397<br>p=0.198 | --                            | 0.195 |
| Sagittal | FEV1     | Skewness  | 0.007  | 0.675<br>SE=0.111<br>p<0.001  | 0.214<br>SE=0.137<br>p=0.122  | --                            | 0.591 |
| Sagittal | FEV1     | Kurtosis  | 0.004  | 0.072<br>SE=0.013<br>p<0.001  | 0.021<br>SE=0.013<br>p=0.119  | --                            | 0.58  |

|          |          |           |        |                               |                               |                              |       |
|----------|----------|-----------|--------|-------------------------------|-------------------------------|------------------------------|-------|
| Sagittal | FEV1     | FractalD  | <0.001 | 10.081<br>SE=1.903<br>p<0.001 | 0.806<br>SE=2.246<br>p=0.720  | --                           | 0.572 |
| Sagittal | FEV1     | Moran's I | <0.001 | -7.054<br>SE=1.891<br>p<0.001 | 4.403<br>SE=2.463<br>p=0.076  | --                           | 0.539 |
| Sagittal | FEV1     | Geary's C | <0.001 | 10.629<br>SE=2.216<br>p<0.001 | -0.481<br>SE=2.015<br>p=0.812 | --                           | 0.554 |
| Sagittal | FVC      | Skewness  | 0.036  | 0.757<br>SE=0.136<br>p<0.001  | 0.320<br>SE=0.169<br>p=0.060  | --                           | 0.62  |
| Sagittal | FVC      | Kurtosis  | 0.037  | 0.078<br>SE=0.016<br>p<0.001  | 0.033<br>SE=0.016<br>p=0.043  | --                           | 0.608 |
| Sagittal | FVC      | FractalD  | 0.017  | 8.980<br>SE=2.414<br>p<0.001  | 1.149<br>SE=2.849<br>p=0.687  | --                           | 0.575 |
| Sagittal | FVC      | Moran's I | 0.001  | -5.213<br>SE=2.342<br>p=0.028 | 6.842<br>SE=3.051<br>p=0.026  | --                           | 0.564 |
| Sagittal | FVC      | Geary's C | 0.05   | 8.425<br>SE=2.806<br>p=0.003  | 1.258<br>SE=2.551<br>p=0.623  | --                           | 0.559 |
| Sagittal | FEV1:FVC | Skewness  | 0.056  | --                            | --                            | 0.014<br>SE=0.012<br>p=0.227 | 0.063 |
| Sagittal | FEV1:FVC | Kurtosis  | 0.02   | 0.004<br>SE=0.002<br>p=0.022  | -0.001<br>SE=0.002<br>p=0.388 | --                           | 0.089 |
| Sagittal | FEV1:FVC | FractalD  | 0.003  | 1.006<br>SE=0.227<br>p<0.001  | 0.070<br>SE=0.268<br>p=0.796  | --                           | 0.168 |
| Sagittal | FEV1:FVC | Moran's I | 0.014  | -1.056<br>SE=0.216<br>p<0.001 | -0.206<br>SE=0.281<br>p=0.466 | --                           | 0.186 |
| Sagittal | FEV1:FVC | Geary's C | <0.001 | 1.305<br>SE=0.252<br>p<0.001  | -0.378<br>SE=0.229<br>p=0.101 | --                           | 0.221 |

## LEGENDS FOR ILLUSTRATIONS

Figure E1. Mean radiomic features throughout the lung for sarcoidosis and healthy controls. Shaded bars represent 95% confidence bands; individual lines represent raw radiomic features throughout the lung per individual, colored by disease group. Results are shown for the right lung and all orientations.

Figure E2. Effect size of the absolute difference in radiomic features throughout the lung between sarcoidosis and healthy control subjects, adjusted for gender, age, and BMI. Assuming a normal approximation, values above 1.96 represent statistically significant differences at a significance level of 0.05. Results are shown for the right lung.
