# Supplementary material
Source: HighWire-hosted journal article supplement (https://erj.ersjournals.com/content/54/2/1900371)

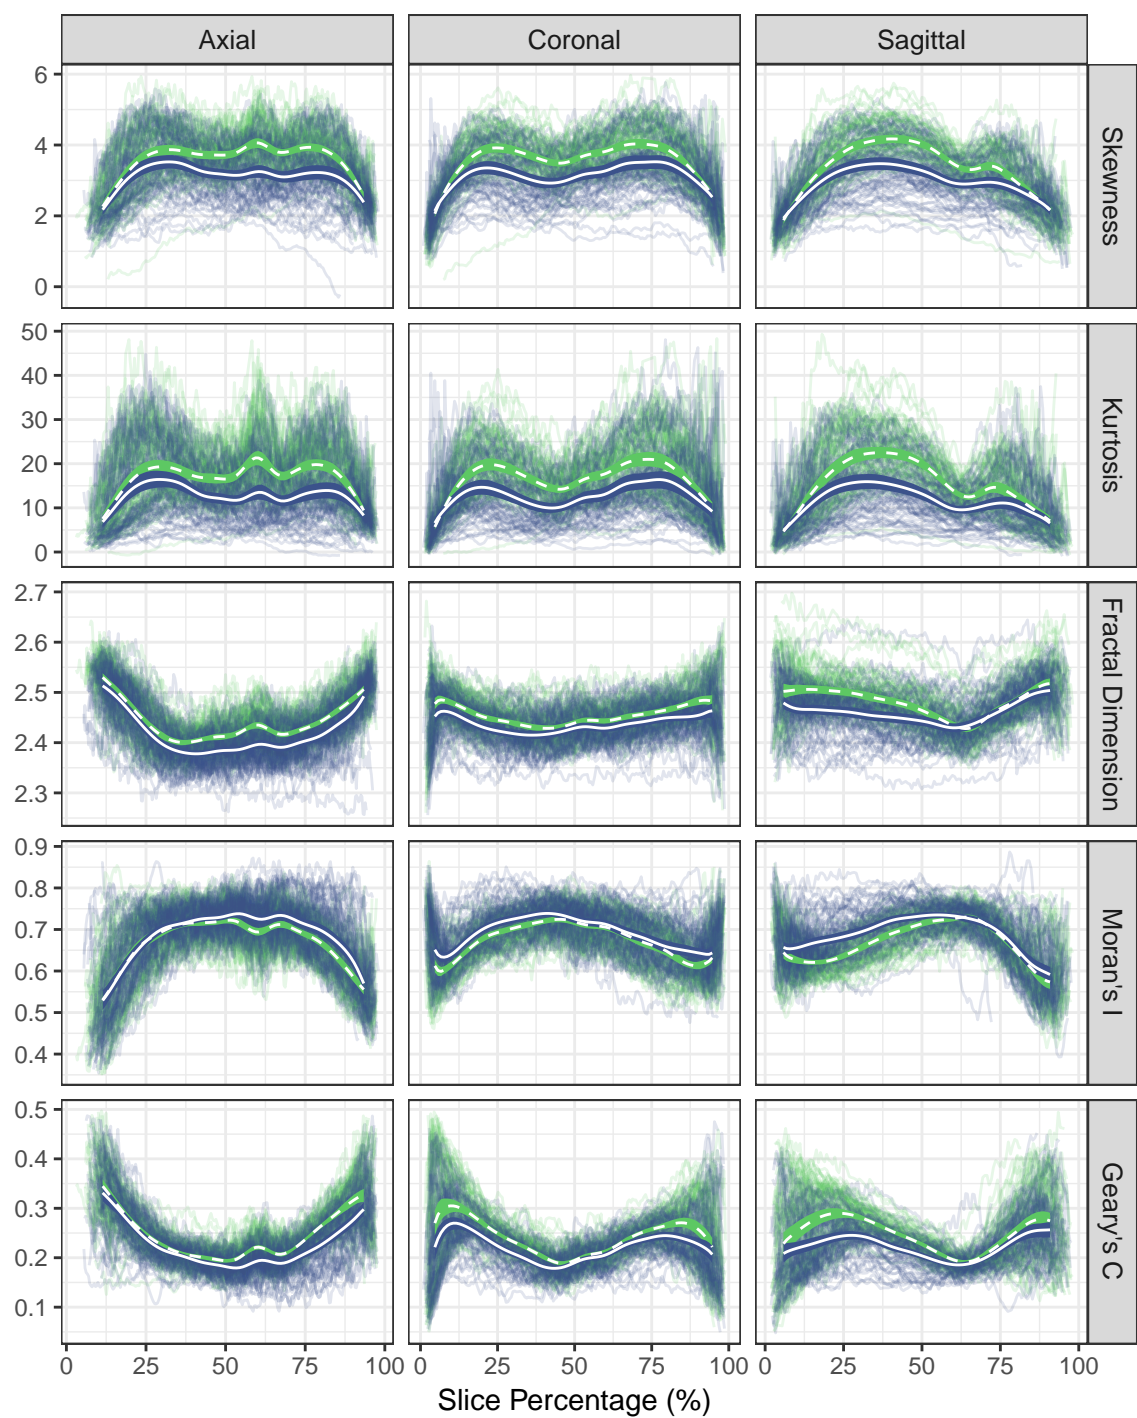

Supplement: inline-supplementary-material-2 [file inline-supplementary-material-2.pdf]
